# Supplementary material for: Adding Concomitant Chemotherapy to Postoperative Radiotherapy in Oral Cavity Carcinoma with Minor Risk Factors: Systematic Review of the Literature and Meta-Analysis
Source: Cancers (Basel). 2022 Jul 29;14(15):3704. doi: 10.3390/cancers14153704 (PMC9367295; doi:10.3390/cancers14153704)
Supplement: Supplementary file 1 [file cancers-14-03704-s001.zip › cancers-1781580-supplementary.pdf]

**Table S1:** Search strings for each database

| Database         | Search (research performed from 2000 until 23 November 2021)                                                                                                                                                                                                                                                                                                                                                                                                                                                                                                                                                                                                                                                                                                                                                                                                                                                                                                                                                                                                                                                                                                                                                                                                                                                                                                                                                                                                                                                    | Number of references                      |
|------------------|-----------------------------------------------------------------------------------------------------------------------------------------------------------------------------------------------------------------------------------------------------------------------------------------------------------------------------------------------------------------------------------------------------------------------------------------------------------------------------------------------------------------------------------------------------------------------------------------------------------------------------------------------------------------------------------------------------------------------------------------------------------------------------------------------------------------------------------------------------------------------------------------------------------------------------------------------------------------------------------------------------------------------------------------------------------------------------------------------------------------------------------------------------------------------------------------------------------------------------------------------------------------------------------------------------------------------------------------------------------------------------------------------------------------------------------------------------------------------------------------------------------------|-------------------------------------------|
| Pubmed           | <p>(((((ORAL CAVITY CARCINOMA) OR (ORAL CANCER)) ) OR (ORAL CAVITY TUMOR)) AND (ADJUVANT RADIOCHEMOTHERAPY)) OR (POSTOPERATIVE RADIOCHEMOTHERAPY)</p> <p>((("mouth"[MeSH Terms] OR "mouth"[All Fields] OR ("oral"[All Fields] AND "cavity"[All Fields]) OR "oral cavity"[All Fields]) AND ("carcinoma"[MeSH Terms] OR "carcinoma"[All Fields] OR "carcinomas"[All Fields] OR "carcinoma s"[All Fields])) OR ("mouth neoplasms"[MeSH Terms] OR ("mouth"[All Fields] AND "neoplasms"[All Fields]) OR "mouth neoplasms"[All Fields] OR ("oral"[All Fields] AND "cancer"[All Fields]) OR "oral cancer"[All Fields]) OR ("mouth neoplasms"[MeSH Terms] OR ("mouth"[All Fields] AND "neoplasms"[All Fields]) OR "mouth neoplasms"[All Fields] OR ("oral"[All Fields] AND "cavity"[All Fields] AND "tumor"[All Fields]) OR "oral cavity tumor"[All Fields])) AND ("chemoradiotherapy, adjuvant"[MeSH Terms] OR ("chemoradiotherapy"[All Fields] AND "adjuvant"[All Fields]) OR "adjuvant chemoradiotherapy"[All Fields] OR ("adjuvant"[All Fields] AND "radiochemotherapy"[All Fields]) OR "adjuvant radiochemotherapy"[All Fields])) OR ("postoperative period"[MeSH Terms] OR ("postoperative"[All Fields] AND "period"[All Fields]) OR "postoperative period"[All Fields] OR "postop"[All Fields] OR "postoperative"[All Fields] OR "postoperatively"[All Fields] OR "postoperatives"[All Fields]) AND ("chemoradiotherapy"[MeSH Terms] OR "chemoradiotherapy"[All Fields] OR "radiochemotherapy"[All Fields]))</p> | 8049                                      |
| Embase           | <p>('mouth carcinoma' OR 'mouth cancer' OR 'mouth tumor') AND 'adjuvant chemoradiotherapy' OR 'postoperative chemoradiotherapy' OR 'adjuvant chemoradiation' OR 'postoperative chemoradiation'</p>                                                                                                                                                                                                                                                                                                                                                                                                                                                                                                                                                                                                                                                                                                                                                                                                                                                                                                                                                                                                                                                                                                                                                                                                                                                                                                              | 2579                                      |
| Cochrane Library | <p>Search Name: oral carcinoma in Title Abstract Keyword AND chemoradiotherapy in Title Abstract Keyword (Word variations have been searched)</p> <p>ID Search</p> <p>#1 oral carcinoma:ti,ab,kw AND chemoradiotherapy:ti,ab,kw with Cochrane Library publication date Between Jan 2000 and Dec 2021 (Word variations have been searched)</p>                                                                                                                                                                                                                                                                                                                                                                                                                                                                                                                                                                                                                                                                                                                                                                                                                                                                                                                                                                                                                                                                                                                                                                   | 413 references trials; 6 cochrane reviews |

**Table S2:** Excluded full papers (numbered on the basis of the References) with main reason

|                                         |                                                                                                                                                                                                                                                                                              |                                                    |
|-----------------------------------------|----------------------------------------------------------------------------------------------------------------------------------------------------------------------------------------------------------------------------------------------------------------------------------------------|----------------------------------------------------|
| 9. Yanamoto S.                          | Multicenter Retrospective Study of Adjuvant Therapy for Patients with Pathologically Lymph Node-Positive Oral Squamous Cell Carcinoma: Analysis of Covariance Using Propensity Score. <i>Ann Surg Oncol</i> , 2015. 22 Suppl 3: p. S992-9.                                                   | No separated data for major and minor risk factors |
| 10. Takahashi (2014)                    | Effects of postoperative chemotherapy and radiotherapy on patients with squamous cell carcinoma of the oral cavity and multiple regional lymph node metastases. <i>Int J Oral Maxillofac Surg</i> . 2014 Jun;43(6):680-5. doi: 10.1016/j.ijom.2013.11.013. Epub 2013 Dec 30. PMID: 24387949. | Only major risk factors                            |
| 11. De Almeida (2020)                   | Treatment implications of postoperative chemoradiotherapy for squamous cell carcinoma of the oral cavity with minor and major extranodal extension <a href="https://doi.org/10.1016/j.oraloncology.2020.104845">https://doi.org/10.1016/j.oraloncology.2020.104845</a>                       | Only major risk factors                            |
| 12. Fan K.H.                            | Combined-modality treatment for advanced oral tongue squamous cell carcinoma. <i>Int J Radiat Oncol Biol Phys</i> , 2007. 67(2): p. 453-61.                                                                                                                                                  | Population analyzed in Fan K.H., 2014              |
| 13. Yamada (2021)                       | A retrospective investigation of minor risk factors as prognostic predictors and treatment indications in oral squamous cell carcinoma <i>J Dent Sci</i> . 2021 Jan;16(1):445-452. doi: 10.1016/j.jds.2020.09.012. Epub 2020 Oct 7. PMID: 33384833; PMCID: PMC7770354.                       | Only major risk factors                            |
| 14. Lee L-Y, Lin C-Y, Cheng N-M, et al. | Poor tumor differentiation is an independent adverse prognostic variable in patients with locally advanced oral cavity cancer— Comparison with pathological risk factors according to the NCCN guidelines. <i>Cancer Med</i> . 2021;10:6627– 6641.                                           | Only major risk factors                            |
| 15. Kim TH, Cha I-H, Choi EC, Kim HR    | Postoperative Concurrent Chemoradiotherapy Versus Radiotherapy Alone for Advanced Oral Cavity Cancer in the Era of Modern Radiation Techniques. <i>Front. Oncol</i> 2021. 11:619372.                                                                                                         | No separated data for major and minor risk factors |
| 16. Anand, A.K., et al.                 | Significance of perineural invasion in locally advanced bucco alveolar complex carcinomas treated with surgery and postoperative radiation ± concurrent chemotherapy. <i>Head Neck</i> , 2017. 39(7): p. 1446-1453                                                                           | No separated data for major and minor risk factors |
| 17. Chen CC 2017                        | Comparison cisplatin with cisplatin plus 5FU in head and neck cancer patients received postoperative chemoradiotherapy. <i>Oral Oncol</i> , 2017. 69: p. 11-14                                                                                                                               | Only major risk factors                            |
| 18. Hasegawa, T., et al.                | Multi-center retrospective study of the prognosis and treatment outcomes of Japanese oral squamous cell carcinoma patients with single lymph node metastasis and extra nodal extension. <i>J Surg Oncol</i> , 2018. 117(8): p. 1736-1743                                                     | No separated data for major and minor risk factors |
| 19. Hasegawa, T., et al                 | Multicenter retrospective study of the prognosis and treatment outcomes of Japanese oral squamous cell carcinoma patients with level IV/V metastasis. <i>Head Neck</i> , 2019. 41(7): p. 2256-2263                                                                                           | No separated data for major and minor risk factors |
| 20. Brooker, R.C., et al.,              | Adjuvant management of locally advanced oral squamous cell carcinoma - real-world challenges and opportunities. <i>Br J Oral Maxillofac Surg</i> , 2021. 59(8): p. 952-958.                                                                                                                  | Registry study                                     |
| 21. Chan, A.K., et al.,                 | Postoperative intensity-modulated radiotherapy following surgery for oral cavity squamous cell carcinoma: patterns of failure. <i>Oral Oncol</i> , 2013. 49(3): p. 255-60.                                                                                                                   | No separated data for major and minor risk factors |
| 22. Harari, P.M., et al.,               | Postoperative chemoradiotherapy and cetuximab for high-risk squamous cell carcinoma of the head and neck: Radiation Therapy Oncology Group RTOG-0234. <i>Journal of Clinical Oncology</i> , 2014. 32(23): p. 2486-2495.                                                                      | No separated data for major and minor risk factors |
| 23. Hingsammer, L., et al.              | The influence of lymph node ratio on survival and disease recurrence in squamous cell carcinoma of the tongue. <i>Int J Oral Maxillofac Surg</i> , 2019. 48(7): p. 851-856                                                                                                                   | No separated data for major and minor risk factors |

|                             |                                                                                                                                                                                                                                                                               |                                                             |
|-----------------------------|-------------------------------------------------------------------------------------------------------------------------------------------------------------------------------------------------------------------------------------------------------------------------------|-------------------------------------------------------------|
| 24. Hinerman, R.W., et al., | Postoperative irradiation for squamous cell carcinoma of the oral cavity: 35-year experience. <i>Head Neck</i> , 2004. 26(11): p. 984-94                                                                                                                                      | No Adjuvant CRT                                             |
| 25. Hasegawa, T., et al.    | Retrospective study of treatment outcomes after postoperative chemoradiotherapy in Japanese oral squamous cell carcinoma patients with risk factors of recurrence. <i>Oral Surg Oral Med Oral Pathol Oral Radiol</i> , 2017. 123(5): p. 524-530                               | No separated data for major and minor risk factors          |
| 26. Jardim, J.F., et al.    | Prognostic impact of perineural invasion and lymphovascular invasion in advanced stage oral squamous cell carcinoma. <i>Int J Oral Maxillofac Surg</i> , 2015. 44(1): p. 23-8                                                                                                 | Only major risk factors                                     |
| 27. Kademani, D., et al.    | Prognostic factors in intraoral squamous cell carcinoma: the influence of histologic grade. <i>J Oral Maxillofac Surg</i> , 2005. 63(11): p. 1599-605.                                                                                                                        | No adjuvant CRT                                             |
| 28. Kang, C.J., et al.,     | The number of pathologically positive lymph nodes and pathological tumor depth predicts prognosis in patients with poorly differentiated squamous cell carcinoma of the oral cavity. <i>Int J Radiat Oncol Biol Phys</i> , 2011. 81(4): p. e223-30                            | No separated data for major and minor risk factors          |
| 29. Kreppel, M., et al.,    | Combined-modality treatment in advanced oral squamous cell carcinoma: Primary surgery followed by adjuvant concomitant radiochemotherapy. <i>Strahlenther Onkol</i> , 2011. 187(9): p. 555-60.                                                                                | CRT for major risk factors                                  |
| 30. Lee, J.H., et al.,      | Adjuvant postoperative radiotherapy with or without chemotherapy for locally advanced squamous cell carcinoma of the head and neck: The importance of patient selection for the postoperative chemoradiotherapy. <i>Cancer Research and Treatment</i> , 2013. 45(1): p. 31-39 | No separated data for site and major and minor risk factors |
| 31. Liao, C.T., et al.,     | Surgical outcome of T4a and resected T4b oral cavity cancer. <i>Cancer</i> , 2006. 107(2): p. 337-44                                                                                                                                                                          | POCRT done also in presence of ECE                          |
| 32. Liao, C.T., et al.,     | Neck dissection field and lymph node density predict prognosis in patients with oral cavity cancer and pathological node metastases treated with adjuvant therapy. <i>Oral Oncology</i> , 2012. 48(4): p. 329-336.                                                            | POCRT done also in presence of major RF                     |
| 33. Liao, C.T., et al.,     | Pathological risk factors stratification in pN3b oral cavity squamous cell carcinoma: Focus on the number of positive nodes and extranodal extension. <i>Oral Oncol</i> , 2018. 86: p. 188-194                                                                                | POCRT done also in presence of major RF                     |
| 34. Lin, Y.W., et al.,      | Patterns of failure after postoperative intensity-modulated radiotherapy for locally advanced buccal cancer: Initial masticator space involvement is the key factor of recurrence. <i>Head Neck</i> , 2018. 40(12): p. 2621-2632                                              | POCRT done only for major risk factors                      |
| 35. Maihoefer, C., et al.,  | Postoperative (chemo) radiation in patients with squamous cell cancers of the head and neck - clinical results from the cohort of the clinical cooperation group "Personalized Radiotherapy in Head and Neck Cancer". <i>Radiat Oncol</i> , 2018. 13(1): p. 123               | No separated data for site and major and minor risk factors |
| 36. Mair, M.D., et al.,     | Depth of invasion, size and number of metastatic nodes predicts extracapsular spread in early oral cancers with occult metastases. <i>Oral Oncology</i> , 2018. 81: p. 95-99                                                                                                  | No data minor risk factors                                  |
| 37. Lee, A., et al.,        | Utilization and Survival of Postoperative Radiation or Chemoradiation for pT1-2N1M0 Head and Neck Cancer. <i>Otolaryngol Head Neck Surg</i> , 2018. 158(4): p. 677-684.                                                                                                       | Mixed population with less than 40 percent of OCC           |
| 38. Lee, Y.G., et al.,      | Treatment strategy and outcomes in locally advanced head and neck squamous cell carcinoma: a nationwide retrospective cohort study (KCSG HN13-01). <i>BMC Cancer</i> , 2020. 20(1): p. 813.                                                                                   | Missing data about adjuvant RTCT                            |
| 39. Leeman, J.E., et al.,   | Patterns of Treatment Failure and Postrecurrence Outcomes Among Patients With Locally Advanced Head and Neck Squamous Cell Carcinoma After Chemoradiotherapy Using Modern Radiation Techniques. <i>JAMA Oncol</i> , 2017. 3(11): p. 1487-1494.                                | POCRT performed mainly for major RF                         |
| 40. Lin, C.S., et al.,      | Squamous cell carcinoma of the buccal mucosa: an aggressive cancer requiring multimodality treatment. <i>Head Neck</i> , 2006. 28(2): p. 150-7.                                                                                                                               | Not POCRT, only PORT                                        |
| 41. Liu, T., et al.,        | The utility of postoperative radiotherapy in intermediate-risk oral squamous cell carcinoma. <i>Int J Oral Maxillofac Surg</i> , 2021. 50(2): p. 143-150.                                                                                                                     | PORT, not POCRT                                             |

|                                    |                                                                                                                                                                                                                                  |                                                                                  |
|------------------------------------|----------------------------------------------------------------------------------------------------------------------------------------------------------------------------------------------------------------------------------|----------------------------------------------------------------------------------|
| 42. Lo, W.L., et al.,              | Outcomes of oral squamous cell carcinoma in Taiwan after surgical therapy: factors affecting survival. J Oral Maxillofac Surg, 2003. 61(7): p. 751-8.                                                                            | Not related to the topic                                                         |
| 43. Luukkaa, M., et al.,           | Treatment of squamous cell carcinoma of the oral cavity, oropharynx and hypopharynx--an analysis of 174 patients in south western Finland. Acta Oncol, 2003. 42(7): p. 756-62.                                                   | Patients treated with POCRT not specified in the study                           |
| 44. Ma'aita, J.K.,                 | Oral cancer in Jordan: a retrospective study of 118 patients. Croat Med J, 2000. 41(1): p. 64-9.                                                                                                                                 | Patients treated with POCRT not specified in the study                           |
| 45. Mair, M.D., et al.,            | Impact of radical treatments on survival in locally advanced T4a and T4b buccal mucosa cancers: Selected surgically treated T4b cancers have similar control rates as T4a. Oral Oncol, 2018. 82: p. 17-22.                       | POCRT done in presence of major risk factors                                     |
| 46. Marra, A., et al.,             | Long-term disease-free survival in surgically-resected oral tongue cancer: a 10-year retrospective study. Acta Otorhinolaryngol Ital, 2019. 39(2): p. 84-91.                                                                     | POCRT done in presence of major risk factors                                     |
| 47. Martínez Carrillo, M., et al., | Selective use of postoperative neck radiotherapy in oral cavity and oropharynx cancer: a prospective clinical study. Radiat Oncol, 2013. 8: p. 103.                                                                              | POCRT done in presence of major risk factors                                     |
| 48. McMahon, J.D., et al.,         | Oral and oropharyngeal cancer in the West of Scotland-long-term outcome data of a prospective audit 1999-2001. Br J Oral Maxillofac Surg, 2011. 49(2): p. 92-8.                                                                  | Risk factors considered for POCRT not specified in the study                     |
| 49. Metcalfe, E., et al.,          | Postoperative (Chemo)Radiotherapy for Oral Cavity Squamous Cell Carcinomas: Outcomes and Patterns of Failure. Clin Oncol (R Coll Radiol), 2017. 29(1): p. 51-59.                                                                 | POCRT done in presence of major risk factors                                     |
| 50. Mroueh, R., et al.,            | Improved outcomes with oral tongue squamous cell carcinoma in Finland. Head Neck, 2017. 39(7): p. 1306-1312.                                                                                                                     | POCRT done in presence of major risk factors                                     |
| 51. Murthy, V., et al.,            | Analysis of prognostic factors in 1180 patients with oral cavity primary cancer treated with definitive or adjuvant radiotherapy. J Cancer Res Ther, 2010. 6(3): p. 282-9.                                                       | POCRT done mainly in presence of major risk factors                              |
| 52. Nair, D., et al.,              | Perineural invasion: Independent prognostic factor in oral cancer that warrants adjuvant treatment. Head Neck, 2018. 40(8): p. 1780-1787.                                                                                        | POCRT done mainly in presence of major risk factors                              |
| 53. Newman, M., et al.,            | Relationship of depth of invasion to survival outcomes and patterns of recurrence for T3 oral tongue squamous cell carcinoma. Oral Oncol, 2021. 116: p. 105195.                                                                  | POCRT done in presence of major risk factors                                     |
| 54. Noble, A.R., et al.,           | Risk Factors Associated with Disease Recurrence in Patients with Stage III/IV Squamous Cell Carcinoma of the Oral Cavity Treated with Surgery and Postoperative Radiotherapy. Anticancer Res, 2016. 36(2): p. 785-92.            | POCRT done in presence of major risk factors                                     |
| 55. Osman, N., et al.,             | Weekly cisplatin concurrently with radiotherapy in head and neck squamous cell cancer: a retrospective analysis of a tertiary institute experience. Eur Arch Otorhinolaryngol, 2014. 271(8): p. 2253-9.                          | Mixed population with definitive RTCT and POCRT with not well specified criteria |
| 56. Palazzi, M., et al.,           | Patterns of postoperative radiotherapy for head and neck cancer in Italy: a prospective, observational study by the head and neck group of the Italian Association for Radiation Oncology (AIRO). Tumori, 2011. 97(2): p. 170-6. | POCRT done mainly in presence of major RF                                        |
| 57. Pillai, V., et al.,            | Prognostic determinants of locally advanced buccal mucosa cancer: Do we need to relook the current staging criteria? Oral Oncol, 2019. 95: p. 43-51.                                                                             | POCRT done also in presence of major RF                                          |

|                                                  |                                                                                                                                                                                                                                                                                                                       |                                                                            |
|--------------------------------------------------|-----------------------------------------------------------------------------------------------------------------------------------------------------------------------------------------------------------------------------------------------------------------------------------------------------------------------|----------------------------------------------------------------------------|
| 58. Quinsan, I.C.M., et al.,                     | Functional outcomes and survival of patients with oral and oropharyngeal cancer after total glossectomy. <i>Braz J Otorhinolaryngol</i> , 2020. 86(5): p. 545-551.                                                                                                                                                    | Mixed population with radical RTCT and surgery                             |
| 59. Rades, D., et al.,                           | Cisplatin superior to carboplatin in adjuvant radiochemotherapy for locally advanced cancers of the oropharynx and oral cavity. <i>Strahlenther Onkol</i> , 2012. 188(1): p. 42-8.                                                                                                                                    | POCRT done also in presence of major RF                                    |
| 60. Santos, F.M.D., G.A. Viani, and J.F. Pavoni, | Evaluation of survival of patients with locally advanced head and neck cancer treated in a single center. <i>Braz J Otorhinolaryngol</i> , 2021. 87(1): p. 3-10.                                                                                                                                                      | POCRT done in presence of major RF                                         |
| 61. Jensen, J.S., et al.,                        | The Copenhagen Oral Cavity Squamous Cell Carcinoma database: protocol and report on establishing a comprehensive oral cavity cancer database. <i>Clin Epidemiol</i> , 2019. 11: p. 733-741.                                                                                                                           | Criteria for POCRT not specified in the article                            |
| 62. Sher, D.J., et al.,                          | Treatment of oral cavity squamous cell carcinoma with adjuvant or definitive intensity-modulated radiation therapy. <i>Int J Radiat Oncol Biol Phys</i> , 2011. 81(4): p. e215-22.                                                                                                                                    | POCRT done in presence of major RF                                         |
| 63. Shia, B.C., et al.,                          | Outcomes for Elderly Patients Aged 70 to 80 Years or Older with Locally Advanced Oral Cavity Squamous Cell Carcinoma: A Propensity Score-Matched, Nationwide, Oldest Old Patient-Based Cohort Study. <i>Cancers (Basel)</i> , 2020. 12(2).                                                                            | No clear data about adjuvant RTCT                                          |
| 64. Silva, P.B., et al.,                         | Prognostic factors on surgically and non-surgically treated oral squamous cell carcinoma: Advances in survival in fifteen years of follow up. <i>J Clin Exp Dent</i> , 2021. 13(3): p. e240-e249.                                                                                                                     | No data about POCRT                                                        |
| 65. Spiotto, M.T., et al.,                       | Differences in Survival With Surgery and Postoperative Radiotherapy Compared With Definitive Chemoradiotherapy for Oral Cavity Cancer: A National Cancer Database Analysis. <i>JAMA Otolaryngol Head Neck Surg</i> , 2017. 143(7): p. 691-699.                                                                        | No clear data about POCRT                                                  |
| 66. Suzuki, M., et al.,                          | Phase I study of weekly docetaxel infusion and concurrent radiation therapy for head and neck cancer. <i>Jpn J Clin Oncol</i> , 2003. 33(6): p. 297-301.                                                                                                                                                              | Data about POCRT in OCC not clear                                          |
| 67. Tangthongkum, M., et al.,                    | Treatment outcome of advance staged oral cavity cancer: concurrent chemoradiotherapy compared with primary surgery. <i>Eur Arch Otorhinolaryngol</i> , 2017. 274(6): p. 2567-2572.                                                                                                                                    | POCRT in presence of major RF                                              |
| 68. Thakar, A., et al.                           | Laryngoscope, 2021. 131(10): p. 2254-2261. Oral Cancer in the Indian Subcontinent-Survival Outcomes and Risk Factors with Primary Surgery                                                                                                                                                                             | POCRT in presence of major RF                                              |
| 69. Wan, X.C., A.M. Egloff, and J. Johnson       | Histological assessment of cervical lymph node identifies patients with head and neck squamous cell carcinoma (HNSCC): Who would benefit from chemoradiation after surgery? <i>Laryngoscope</i> , 2012. 122(12): p. 2712-2722.                                                                                        | Mixed population and more than half of patients with ECE                   |
| 70. Yokota, T., et al.                           | Prognostic Factors and Multidisciplinary Postoperative Chemoradiotherapy for Clinical T4a Tongue Cancer. <i>Oncology</i> , 2016. 91(2): p. 78-84.                                                                                                                                                                     | POCRT done mainly in patients with major risk factors                      |
| 71. Zaroni, D.K., et al.                         | Survival outcomes after treatment of cancer of the oral cavity (1985–2015). <i>Oral Oncology</i> , 2019. 90: p. 115-121.                                                                                                                                                                                              | Not possible extrapolation of data for OCC                                 |
| 72. Zumsteg, ZS, et al                           | Quantitative lymph node burden as a 'very-high-risk' factor identifying head and neck cancer patients benefiting from postoperative chemoradiation. <i>Ann Oncol</i> . 2019 Oct 1;30(10):1669. doi: 10.1093/annonc/mdz172. Erratum for: <i>Ann Oncol</i> . 2019 Jan 1;30(1):76-84. PMID: 31168574; PMCID: PMC6857612. | POCRT done also in presence of major RF; outcome of minor RF not evaluable |
